# Supplementary material
Source: PubMed Central journal article supplement (PMC3175575)
Supplement: supp_45_3_610__1.pdf [file supp_45_3_610__1.pdf]

Neonatal hyperoxia adds to smoke-induced COPD changes

**Table 1.** Supplemental Data

| <b>Age</b> | <b>MCL (<math>\mu\text{m}</math>)</b> | <b>Water displacement, left lobe only (<math>\text{cm}^3</math>)</b> | <b>SA=4*V/MCL*</b> |
|------------|---------------------------------------|----------------------------------------------------------------------|--------------------|
| One month  | 25.84 $\pm$ 1.7                       | 0.18 $\pm$ 0.029                                                     | 0.028 $\pm$ 0.005  |
| Six months | 32.91 $\pm$ 3.0                       | 0.27 $\pm$ 0.039                                                     | 0.032 $\pm$ 0.004  |

**\*p <0.132**
